# Supplementary material
Source: PubMed Central journal article supplement (PMC9841044)
Supplement: mmc1.pdf [file mmc1.pdf]

## Supplement material

### Polymerase chain reaction (PCR) test code:

- ✓ TNX:9088 SARS coronavirus 2 and related RNA [Presence]  
UMLS:LNC:94764-8 SARS-CoV-2 (COVID-19) whole genome [Nucleotide sequence] in Isolate or Specimen by Sequencing
- ✓ UMLS:LNC:94531-1 SARS-CoV-2 (COVID-19) RNA panel - Respiratory specimen by NAA with probe detection
- ✓ UMLS:LNC:94306-8 SARS-CoV-2 (COVID-19) RNA panel - Specimen by NAA with probe detection
- ✓ UMLS:LNC:41458-1 SARS coronavirus RNA [Presence] in Specimen by NAA with probe detection
- ✓ UMLS:LNC:95522-9 SARS-CoV-2 (COVID-19) N gene [Log #/volume] (viral load) in Respiratory specimen by NAA with probe detection

### COVID-19-related vaccination code:

- ✓ UMLS:CPT:91300 Severe acute respiratory syndrome coronavirus 2 (SARS-CoV-2) (Coronavirus disease [COVID-19]) vaccine, mRNA-LNP, spike protein, preservative free, 30 mcg/0.3mL dosage, diluent reconstituted, for intramuscular use
- ✓ UMLS:CPT:91301 Severe acute respiratory syndrome coronavirus 2 (SARS-CoV-2) (Coronavirus disease [COVID-19]) vaccine, mRNA-LNP, spike protein, preservative free, 100 mcg/0.5mL dosage, for intramuscular use
- ✓ UMLS:CPT:91302 Severe acute respiratory syndrome coronavirus 2 (SARS-CoV-2) (coronavirus disease [COVID-19]) vaccine, DNA, spike protein, chimpanzee adenovirus Oxford 1 (ChAdOx1) vector, preservative free,  $5 \times 10^{10}$  viral particles/0.5mL dosage, for intramuscular use
- ✓ UMLS:CPT:91303 Severe acute respiratory syndrome coronavirus 2 (SARS-CoV-2) (coronavirus disease [COVID-19]) vaccine, DNA, spike protein, adenovirus type 26 (Ad26) vector, preservative free,  $5 \times 10^{10}$  viral particles/0.5mL dosage, for intramuscular use
- ✓ UMLS:CPT:91305 Severe acute respiratory syndrome coronavirus 2 (SARS-CoV-2) (coronavirus disease [COVID-19]) vaccine, mRNA-LNP, spike protein, preservative free, 30 mcg/0.3 mL dosage, tris-sucrose formulation, for intramuscular use
- ✓ UMLS:CPT:91306 Severe acute respiratory syndrome coronavirus 2 (SARS-CoV-2) (coronavirus disease [COVID-19]) vaccine, mRNA-LNP, spike protein, preservative free, 50 mcg/0.25 mL dosage, for intramuscular use

- ✓ UMLS:CPT:91307 Severe acute respiratory syndrome coronavirus 2 (SARS-CoV-2) (coronavirus disease [COVID-19]) vaccine, mRNA-LNP, spike protein, preservative free, 10 mcg/0.2 mL dosage, diluent reconstituted, tris-sucrose formulation, for intramuscular use
- ✓ UMLS:CPT:91308 Severe acute respiratory syndrome coronavirus 2 (SARS-CoV-2) (coronavirus disease [COVID-19]) vaccine, mRNA-LNP, spike protein, preservative free, 3 mcg/0.2 mL dosage, diluent reconstituted, tris-sucrose formulation, for intramuscular use
- ✓ NLM:CVX:213 SARS-CoV-2 (COVID-19) Vaccine
- ✓ NLM:RXNORM:2479831 SARS-COV-2 (COVID-19) vaccine, vector non-replicating
- ✓ NLM:RXNORM:2468231 SARS-CoV-2 (COVID-19) vaccine, mRNA spike protein
- ✓ UMLS:ICD10PCS:XW023S6 Introduction of COVID-19 Vaccine Dose 1 into Muscle, Percutaneous Approach, New Technology Group 6
- ✓ UMLS:ICD10PCS:XW023T6 Introduction of COVID-19 Vaccine Dose 2 into Muscle, Percutaneous Approach, New Technology Group 6
- ✓ UMLS:ICD10PCS:XW023U6 Introduction of COVID-19 Vaccine into Muscle, Percutaneous Approach, New Technology Group 6
- ✓ UMLS:ICD10PCS:XW013S6 Introduction of COVID-19 Vaccine Dose 1 into Subcutaneous Tissue, Percutaneous Approach, New Technology Group 6
- ✓ UMLS:ICD10PCS:XW013T6 Introduction of COVID-19 Vaccine Dose 2 into Subcutaneous Tissue, Percutaneous Approach, New Technology Group 6
- ✓ UMLS:ICD10PCS:XW013U6 Introduction of COVID-19 Vaccine into Subcutaneous Tissue, Percutaneous Approach, New Technology Group 6

**Table S1.** Risk of autoimmune diseases among COVID-19 patients compared to control subjects

| Outcomes                             | Autoimmune diseases |         | Hazard ratio (95%CI)     |                          |
|--------------------------------------|---------------------|---------|--------------------------|--------------------------|
|                                      | COVID-19            | Control | Crude                    | Adjusted <sup>a</sup>    |
| <b>Inflammatory arthritis</b>        |                     |         |                          |                          |
| Rheumatoid arthritis                 | 2878                | 1044    | <b>3.01 (2.87-3.16)*</b> | <b>2.98 (2.78-3.20)*</b> |
| Ankylosing spondylitis               | 243                 | 82      | <b>3.01 (2.54-3.57)</b>  | <b>3.21 (2.50-4.13)</b>  |
| <b>Connective tissue disease</b>     |                     |         |                          |                          |
| Systemic lupus erythematosus         | 1189                | 429     | <b>3.26 (3.02-3.53)</b>  | <b>2.99 (2.68-3.34)</b>  |
| Dermatopolymyositis                  | 131                 | 72      | <b>2.12 (1.71-2.63)</b>  | <b>1.96 (1.47-2.61)</b>  |
| Systemic sclerosis                   | 222                 | 93      | <b>2.74 (2.31-3.26)</b>  | <b>2.58 (2.02-3.28)</b>  |
| Sjogren's syndrome                   | 727                 | 301     | <b>2.91 (2.64-3.21)</b>  | <b>2.62 (2.29-3.00)</b>  |
| Mixed connective tissue disease      | 139                 | 48      | <b>3.35 (2.66-4.23)</b>  | <b>3.14 (2.26-4.36)</b>  |
| Behçet's disease                     | 45                  | 21      | <b>2.92 (1.97-4.34)</b>  | <b>2.32 (1.38-3.89)</b>  |
| Polymyalgia rheumatica               | 330                 | 123     | <b>2.52 (2.19-2.90)</b>  | <b>2.90 (2.36-3.57)</b>  |
| Vasculitis                           | 800                 | 444     | <b>1.99 (1.82-2.17)</b>  | <b>1.96 (1.74-2.20)</b>  |
| Psoriasis                            | 1967                | 734     | <b>3.09 (2.91-3.28)*</b> | <b>2.91 (2.67-3.17)</b>  |
| <b>Intestinal related autoimmune</b> |                     |         |                          |                          |
| Inflammatory bowel disease           | 7945                | 4863    | <b>1.85 (1.80-1.90)</b>  | <b>1.78 (1.72-1.84)</b>  |
| Celiac disease                       | 434                 | 254     | <b>1.96 (1.74-2.20)</b>  | <b>1.85 (1.59-2.16)</b>  |
| <b>Type 1 DM</b>                     | 3263                | 1318    | <b>3.42 (3.26-3.59)*</b> | <b>2.68 (2.51-2.85)*</b> |
| <b>Mortality</b>                     | 6385                | 5769    | <b>1.14 (1.11-1.17)*</b> | <b>1.20 (1.16-1.24)*</b> |

\* Proportionality <0.001; CI: Confidence interval.

Crude: before matching; Adjusted: after matching.

a. Propensity score matching was performed based on age at index, sex, race, adverse socioeconomic status (problem related to housing and economic circumstances, problems related to employment and unemployment, problems related to education and literacy, occupational exposure to risk factors), and comorbidities (type 2 diabetes, vitamin D deficiency, hyperlipidemia, asthma, depression, chronic kidney disease, sleep disorder, psychoactive substance use, and BMI).

Abbreviations: DM, diabetes mellitus

**Table S2.** Risk of autoimmune diseases among COVID-19 patients compared to control subjects (stratified by sex)

| Outcomes                             | Hazard ratio (95%CI) |                       |                   |                       |
|--------------------------------------|----------------------|-----------------------|-------------------|-----------------------|
|                                      | Male                 |                       | Female            |                       |
|                                      | Crude                | Adjusted <sup>a</sup> | Crude             | Adjusted <sup>a</sup> |
| <b>Inflammatory arthritis</b>        |                      |                       |                   |                       |
| Rheumatoid arthritis                 | 2.45 (2.22-2.71)*    | 2.61 (2.27-3.01)      | 3.17 (3.00-3.36)* | 3.06 (2.82-3.32)      |
| Ankylosing spondylitis               | 2.58 (2.01-3.32)     | 2.94 (2.02-4.30)      | 3.52 (2.81-4.40)  | 3.21 (2.33-4.42)      |
| <b>Connective tissue disease</b>     |                      |                       |                   |                       |
| Systemic lupus erythematosus         | 2.17 (1.72-2.72)     | 2.05 (1.51-2.80)      | 3.31 (3.06-3.61)* | 2.89 (2.57-3.24)*     |
| Dermatopolymyositis                  | 1.64 (1.08-2.49)     | 1.64 (0.94-2.85)      | 2.44 (1.90-3.13)  | 2.00 (1.44-2.79)      |
| Systemic sclerosis                   | 1.91 (1.25-2.90)     | 1.50 (0.87-2.57)      | 2.86 (2.37-3.46)  | 2.53 (1.95-3.29)      |
| Sjogren's syndrome                   | 2.19 (1.65-2.92)     | 2.80 (1.82-4.31)      | 2.91 (2.63-3.22)  | 2.81 (2.43-3.25)      |
| Mixed connective tissue disease      | 2.09 (1.21-3.62)     | 2.11 (0.98-4.54)      | 3.63 (2.83-4.66)  | 3.29 (2.29-4.73)      |
| Behçet's disease                     | 2.50 (1.12-5.55)     | 1.47 (0.51-4.23)      | 3.31 (2.12-5.15)  | 2.82 (1.52-5.21)      |
| Polymyalgia rheumatica               | 2.49 (1.99-3.13)     | 2.66 (1.93-3.68)      | 2.69 (2.25-3.22)  | 3.00 (2.30-3.92)      |
| Vasculitis                           | 2.21 (1.95-2.52)     | 2.15 (1.80-2.57)      | 2.47 (2.24-2.73)  | 2.29 (2.00-2.63)      |
| Psoriasis                            | 2.91 (2.65-3.19)     | 2.77 (2.42-3.16)      | 3.26 (3.02-3.52)* | 3.11 (2.79-3.48)*     |
| <b>Intestinal related autoimmune</b> |                      |                       |                   |                       |
| Inflammatory bowel disease           | 1.82 (1.74-1.90)     | 1.81 (1.71-1.92)      | 1.92 (1.86-1.99)  | 1.84 (1.76-1.92)      |
| Celiac disease                       | 1.92 (1.53-2.41)     | 1.78 (1.31-2.41)      | 2.01 (1.76-2.30)  | 1.87 (1.56-2.23)      |
| <b>Type 1 DM</b>                     | 3.15 (2.95-3.37)*    | 2.78 (2.53-3.06)      | 3.96 (3.70-4.24)* | 3.04 (2.77-3.33)*     |
| <b>Mortality</b>                     | 1.20 (1.15-1.24)*    | 1.24 (1.18-1.30)*     | 1.11 (1.07-1.16)* | 1.15 (1.09-1.22)*     |

\* Proportionality <0.001; CI: Confidence interval;  
Crude: before matching; Adjusted: after matching.

a. Propensity score matching was performed based on age at index, sex, race, adverse socioeconomic status (problem related to housing and economic circumstances, problems related to employment and unemployment, problems related to education and literacy, occupational exposure to risk factors), and comorbidities (type 2 diabetes, vitamin D deficiency, hyperlipidemia, asthma, depression, chronic kidney disease, sleep disorder, psychoactive substance use, and BMI).

Abbreviations: DM, diabetes mellitus

**Table S3.** Risk of autoimmune diseases among COVID-19 patients compared to control subjects (stratified by age)

| Outcomes                             | Hazard ratio (95%CI) |                       |                   |                       |                   |                       |
|--------------------------------------|----------------------|-----------------------|-------------------|-----------------------|-------------------|-----------------------|
|                                      | 18-40y               |                       | 41-64y            |                       | ≥ 65y             |                       |
|                                      | Crude                | Adjusted <sup>a</sup> | Crude             | Adjusted <sup>a</sup> | Crude             | Adjusted <sup>a</sup> |
| <b>Inflammatory arthritis</b>        |                      |                       |                   |                       |                   |                       |
| Rheumatoid arthritis                 | 2.79 (2.41-3.23)     | 2.65 (2.16-3.25)      | 3.08 (2.86-3.31)* | 2.91 (2.63-3.22)      | 3.65 (3.39-3.93)* | 3.38 (3.02-3.78)      |
| Ankylosing spondylitis               | 2.54 (1.85-3.49)     | 2.05 (1.34-3.14)      | 3.48 (2.73-4.42)  | 3.80 (2.65-5.44)      | 3.08 (2.20-4.31)  | 2.45 (1.53-3.94)      |
| <b>Connective tissue disease</b>     |                      |                       |                   |                       |                   |                       |
| Systemic lupus erythematosus         | 2.74 (2.40-3.12)     | 2.51 (2.10-3.01)      | 3.60 (3.22-4.02)  | 3.45 (2.93-4.07)      | 3.44 (2.86-4.13)  | 2.68 (2.06-3.49)      |
| Dermatopolymyositis                  | 1.96 (1.24-3.11)     | 1.80 (0.93-3.49)      | 2.45 (1.80-3.32)  | 1.93 (1.30-2.87)      | 2.30 (1.56-3.41)  | 2.24 (1.29-3.88)      |
| Systemic sclerosis                   | 2.15 (1.34-3.48)     | 2.26 (1.17-4.36)      | 3.49 (2.73-4.45)  | 2.93 (2.09-4.11)      | 2.53 (1.90-3.36)  | 2.76 (1.79-4.25)      |
| Sjogren's syndrome                   | 2.05 (1.62-2.59)     | 1.66 (1.23-2.26)      | 3.55 (3.10-4.07)  | 3.25 (2.68-3.95)      | 2.98 (2.52-3.52)  | 2.95 (2.28-3.80)      |
| Mixed connective tissue disease      | 2.39 (1.47-3.90)     | 1.96 (1.05-3.68)      | 3.99 (2.91-5.47)  | 3.48 (2.22-5.46)      | 3.50 (2.26-5.44)  | 2.82 (1.48-5.38)      |
| Behçet's disease                     | 3.02 (1.77-5.15)     | 2.82 (1.31-6.06)      | 3.22 (1.76-5.90)  | 3.06 (1.29-7.23)      | 1.86 (0.36-9.60)  | 0.39 (0.04-3.74)      |
| Polymyalgia rheumatica               | 2.60 (1.22-5.55)     | 2.55 (0.90-7.24)      | 2.57 (1.94-3.41)  | 2.05 (1.40-2.99)      | 3.38 (2.86-3.98)  | 2.96 (2.32-3.78)      |
| Vasculitis                           | 2.32 (1.99-2.70)     | 2.63 (2.10-3.30)      | 2.37 (2.10-2.69)  | 2.08 (1.77-2.45)      | 2.76 (2.41-3.17)  | 2.38 (1.95-2.89)      |
| Psoriasis                            | 2.44 (2.17-2.74)     | 2.27 (1.93-2.66)      | 3.33 (3.05-3.62)* | 3.52 (3.10-3.98)      | 3.73 (3.31-4.21)* | 3.61 (2.99-4.36)      |
| <b>Intestinal related autoimmune</b> |                      |                       |                   |                       |                   |                       |
| Inflammatory bowel disease           | 1.84 (1.76-1.93)     | 1.78 (1.68-1.89)      | 1.87 (1.80-1.96)  | 1.75 (1.65-1.85)      | 2.10 (1.99-2.21)  | 1.85 (1.72-1.99)      |
| Celiac disease                       | 1.71 (1.44-2.02)     | 1.54 (1.24-1.92)      | 2.27 (1.88-2.74)  | 1.89 (1.49-2.41)      | 2.26 (1.68-3.05)  | 2.15 (1.41-3.28)      |
| <b>Type 1 DM</b>                     | 3.55 (3.27-3.85)     | 2.78 (2.49-3.11)      | 3.18 (2.96-3.43)* | 2.59 (2.35-2.86)      | 4.18 (3.80-4.60)* | 3.26 (2.84-3.74)      |
| <b>Mortality</b>                     | 1.01 (0.90-1.13)     | 0.97 (0.84-1.12)      | 1.22 (1.16-1.29)* | 1.26 (1.18-1.35)*     | 1.41 (1.36-1.46)* | 1.22 (1.17-1.28)*     |

\* Proportionality <0.001; CI: Confidence interval;

Crude: before matching; Adjusted: after matching.

a. Propensity score matching was performed based on age at index, sex, race, adverse socioeconomic status (problem related to housing and economic circumstances, problems related to employment and unemployment, problems related to education and literacy, occupational exposure to risk factors), and comorbidities (type 2 diabetes, vitamin D deficiency, hyperlipidemia, asthma, depression, chronic kidney disease, sleep disorder, psychoactive substance use, and BMI). Abbreviations: DM, diabetes mellitus

**Table S4.** Risk of autoimmune diseases among COVID-19 patients compared to control subjects (stratified by race)

| Outcomes                             | Hazard ratio (95%CI) |                       |                        |                       |                  |                       |
|--------------------------------------|----------------------|-----------------------|------------------------|-----------------------|------------------|-----------------------|
|                                      | White                |                       | Black/African American |                       | Asian            |                       |
|                                      | Crude                | Adjusted <sup>a</sup> | Crude                  | Adjusted <sup>a</sup> | Crude            | Adjusted <sup>a</sup> |
| <b>Inflammatory arthritis</b>        |                      |                       |                        |                       |                  |                       |
| Rheumatoid arthritis                 | 3.11 (2.94-3.29)     | 3.02 (2.78-3.28)*     | 3.09 (2.74-3.48)*      | 2.95 (2.49-3.50)      | 2.46 (1.60-3.76) | 2.12 (1.18-3.81)      |
| Ankylosing spondylitis               | 3.14 (2.61-3.78)     | 2.75 (2.12-3.58)      | 3.06 (1.81-5.17)       | 3.18 (1.49-6.79)      | 3.38 (1.03-11.1) | 2.20 (0.40-12.0)      |
| <b>Connective tissue disease</b>     |                      |                       |                        |                       |                  |                       |
| Systemic lupus erythematosus         | 3.15 (2.83-3.51)     | 3.14 (2.68-3.68)      | 3.35 (2.95-3.81)*      | 3.04 (2.53-3.65)      | 2.96 (1.73-5.08) | 3.56 (1.53-8.29)      |
| Dermatopolymyositis                  | 2.28 (1.73-3.00)     | 1.99 (1.37-2.89)      | 2.15 (1.43-3.23)       | 1.73 (1.04-2.89)      | 4.83 (1.47-15.8) | 1.10 (0.28-4.40)      |
| Systemic sclerosis                   | 2.84 (2.32-3.49)     | 2.38 (1.80-3.15)      | 1.74 (1.15-2.63)       | 1.46 (0.86-2.47)      | 3.35 (1.02-11.0) | 5.42 (0.63-46.4)      |
| Sjogren's syndrome                   | 3.11 (2.78-3.47)     | 2.74 (2.35-3.21)      | 2.86 (2.25-3.63)       | 2.74 (1.95-3.84)      | 2.41 (1.21-4.79) | 1.66 (0.68-4.06)      |
| Mixed connective tissue disease      | 3.42 (2.53-4.62)     | 4.49 (2.72-7.42)      | 3.57 (2.41-5.29)       | 3.12 (1.79-5.42)      | 1.39 (0.14-13.3) | NA                    |
| Behçet's disease                     | 3.45 (2.12-5.61)     | 2.25 (1.19-4.25)      | 2.69 (1.12-6.50)       | 2.92 (0.78-11.0)      | 1.35 (0.14-13.0) | NA                    |
| Polymyalgia rheumatica               | 2.92 (2.51-3.39)     | 3.46 (2.75-4.37)      | 1.62 (0.99-2.63)       | 1.17 (0.61-2.23)      | 1.35 (0.37-4.98) | 0.83 (0.19-3.69)      |
| Vasculitis                           | 2.40 (2.19-2.63)     | 2.21 (1.95-2.51)      | 2.49 (2.04-3.05)       | 2.11 (1.62-2.75)      | 1.58 (0.79-3.18) | 2.21 (0.67-7.33)      |
| Psoriasis                            | 3.31 (3.10-3.54)     | 3.22 (2.92-3.54)      | 2.95 (2.34-3.71)       | 3.36 (2.37-4.76)      | 2.45 (1.58-3.80) | 1.65 (0.94-2.90)      |
| <b>Intestinal related autoimmune</b> |                      |                       |                        |                       |                  |                       |
| Inflammatory bowel disease           | 1.94 (1.88-2.00)     | 1.88 (1.80-1.96)      | 1.85 (1.73-1.99)       | 1.78 (1.62-1.95)      | 1.52 (1.19-1.95) | 1.51 (1.08-2.11)      |
| Celiac disease                       | 2.21 (1.96-2.50)     | 2.07 (1.75-2.44)      | 1.39 (0.75-2.60)       | 1.71 (0.74-3.95)      | 1.87 (0.71-4.92) | 2.21 (0.55-8.85)      |
| <b>Type 1 DM</b>                     | 3.72 (3.51-3.94)*    | 2.90 (2.67-3.14)*     | 3.08 (2.79-3.39)*      | 2.50 (2.20-2.85)*     | 3.19 (2.08-4.88) | 2.57 (1.38-4.80)      |
| <b>Mortality</b>                     | 1.09 (1.06-1.13)*    | 1.15 (1.10-1.20)*     | 1.29 (1.21-1.38)*      | 1.40 (1.29-1.52)*     | 1.66 (1.32-2.09) | 1.94 (1.39-2.69)      |

\* Proportionality <0.001; CI: Confidence interval;

Crude: before matching; Adjusted: after matching.

a. Propensity score matching was performed based on age at index, sex, race, adverse socioeconomic status (problem related to housing and economic circumstances, problems related to employment and unemployment, problems related to education and literacy, occupational exposure to risk factors), and comorbidities (type 2 diabetes, vitamin D deficiency, hyperlipidemia, asthma, depression, chronic kidney disease, sleep disorder, psychoactive substance use, and BMI).

Abbreviations: DM, diabetes mellitus

**Table S5.** Sensitivity analysis (stratified by inpatient/outpatient)

| Outcomes                             | Hazard ratio (95%CI)     |                          |                          |                          |
|--------------------------------------|--------------------------|--------------------------|--------------------------|--------------------------|
|                                      | Inpatient                |                          | Outpatient               |                          |
|                                      | Crude                    | Adjusted <sup>a</sup>    | Crude                    | Adjusted <sup>a</sup>    |
| <b>Inflammatory arthritis</b>        |                          |                          |                          |                          |
| Rheumatoid arthritis                 | 0.97 (0.77-1.21)         | 1.02 (0.76-1.37)         | <b>3.48 (3.30-3.67)*</b> | <b>3.07 (2.85-3.31)*</b> |
| Ankylosing spondylitis               | 0.54 (0.20-1.46)         | 0.78 (0.22-2.77)         | <b>3.52 (2.94-4.22)</b>  | <b>3.44 (2.65-4.47)</b>  |
| <b>Connective tissue disease</b>     |                          |                          |                          |                          |
| Systemic lupus erythematosus         | 0.78 (0.54-1.13)         | 0.82 (0.51-1.32)         | <b>3.99 (3.66-4.34)*</b> | <b>3.11 (2.77-3.50)*</b> |
| Dermatopolymyositis                  | 0.69 (0.28-1.70)         | 0.97 (0.30-3.19)         | <b>2.89 (2.28-3.67)</b>  | <b>2.11 (1.54-2.91)</b>  |
| Systemic sclerosis                   | 0.26 (0.06-1.06)         | <b>0.21 (0.05-0.97)</b>  | <b>3.21 (2.67-3.87)</b>  | <b>2.76 (2.14-3.56)</b>  |
| Sjogren's syndrome                   | 0.78 (0.43-1.39)         | 0.76 (0.35-1.61)         | <b>3.01 (2.72-3.33)*</b> | <b>2.49 (2.18-2.86)</b>  |
| Mixed connective tissue disease      | 0.54 (0.13-2.22)         | 0.78 (0.13-4.66)         | <b>3.89 (3.05-4.98)</b>  | <b>3.16 (2.24-4.45)</b>  |
| Behçet's disease                     | NA                       | NA                       | <b>3.81 (2.49-5.82)</b>  | <b>3.04 (1.69-5.48)</b>  |
| Polymyalgia rheumatica               | 1.05 (0.55-2.00)         | 1.06 (0.45-2.50)         | <b>2.81 (2.42-3.27)</b>  | <b>2.31 (1.89-2.82)</b>  |
| Vasculitis                           | 0.92 (0.67-1.26)         | 0.94 (0.62-1.44)         | <b>2.92 (2.67-3.19)</b>  | <b>2.49 (2.21-2.81)</b>  |
| Psoriasis                            | 1.26 (0.96-1.66)         | <b>1.60 (1.07-2.40)</b>  | <b>3.30 (3.10-3.52)*</b> | <b>3.11 (2.84-3.41)*</b> |
| <b>Intestinal related autoimmune</b> |                          |                          |                          |                          |
| Inflammatory bowel disease           | <b>0.79 (0.71-0.89)</b>  | <b>0.76 (0.65-0.87)</b>  | <b>2.14 (2.08-2.20)*</b> | <b>1.93 (1.86-2.01)*</b> |
| Celiac disease                       | NA                       | NA                       | <b>2.07 (1.84-2.34)</b>  | <b>1.81 (1.55-2.11)</b>  |
| <b>Type 1 DM</b>                     | 1.12 (0.95-1.32)         | 0.86 (0.70-1.06)         | <b>5.20 (4.91-5.51)*</b> | <b>3.66 (3.39-3.95)*</b> |
| <b>Mortality</b>                     | <b>1.39 (1.32-1.47)*</b> | <b>1.37 (1.27-1.48)*</b> | <b>1.81 (1.75-1.88)*</b> | <b>1.75 (1.67-1.83)*</b> |

\* Proportionality <0.001; CI: Confidence interval;  
Crude: before matching; Adjusted: after matching.

a. Propensity score matching was performed based on age at index, sex, race, adverse socioeconomic status (problem related to housing and economic circumstances, problems related to employment and unemployment, problems related to education and literacy, occupational exposure to risk factors), and comorbidities (type 2 diabetes, vitamin D deficiency, hyperlipidemia, asthma, depression, chronic kidney disease, sleep disorder, psychoactive substance use, and BMI).

Abbreviations: DM, diabetes mellitus

**Table S6.** Sensitivity analysis (stratified by different network)

| Outcomes                             | Hazard ratio (95%CI)    |                         |                          |                          |
|--------------------------------------|-------------------------|-------------------------|--------------------------|--------------------------|
|                                      | EMEA network            |                         | Global network           |                          |
|                                      | Crude                   | Adjusted <sup>a</sup>   | Crude                    | Adjusted <sup>a</sup>    |
| <b>Inflammatory arthritis</b>        |                         |                         |                          |                          |
| Rheumatoid arthritis                 | <b>0.44 (0.30-0.67)</b> | <b>0.60 (0.39-0.91)</b> | <b>2.22 (2.12-2.33)*</b> | <b>2.46 (2.30-2.63)*</b> |
| Ankylosing spondylitis               | <b>0.13 (0.03-0.54)</b> | <b>0.15 (0.03-0.64)</b> | <b>2.10 (1.79-2.47)</b>  | <b>2.16 (1.74-2.68)</b>  |
| <b>Connective tissue disease</b>     |                         |                         |                          |                          |
| Systemic lupus erythematosus         | 0.52 (0.23-1.18)        | 0.68 (0.28-1.64)        | <b>2.44 (2.26-2.63)*</b> | <b>2.47 (2.22-2.74)</b>  |
| Dermatopolymyositis                  | <b>0.15 (0.04-0.63)</b> | <b>0.17 (0.04-0.75)</b> | <b>1.50 (1.22-1.84)</b>  | <b>1.41 (1.09-1.83)</b>  |
| Systemic sclerosis                   | 0.66 (0.30-1.45)        | 0.99 (0.40-2.43)        | <b>1.97 (1.67-2.32)</b>  | <b>1.91 (1.55-2.37)</b>  |
| Sjogren's syndrome                   | 0.89 (0.49-1.63)        | 1.10 (0.54-2.26)        | <b>2.17 (1.98-2.39)*</b> | <b>2.39 (2.10-2.72)</b>  |
| Mixed connective tissue disease      | NA                      | NA                      | <b>2.46 (1.97-3.07)</b>  | <b>2.35 (1.74-3.16)</b>  |
| Behçet's disease                     | 1.06 (0.10-11.7)        | 0.55 (0.05-6.06)        | <b>2.42 (1.66-3.52)</b>  | <b>2.37 (1.42-3.96)</b>  |
| Polymyalgia rheumatica               | <b>0.14 (0.03-0.57)</b> | <b>0.19 (0.06-0.66)</b> | <b>1.87 (1.63-2.14)</b>  | <b>2.39 (1.97-2.90)</b>  |
| Vasculitis                           | <b>0.18 (0.10-0.32)</b> | <b>0.28 (0.16-0.51)</b> | <b>1.67 (1.54-1.80)</b>  | <b>1.65 (1.49-1.82)</b>  |
| Psoriasis                            | <b>0.44 (0.28-0.72)</b> | <b>0.50 (0.31-0.80)</b> | <b>2.29 (2.16-2.43)*</b> | <b>2.32 (2.14-2.51)*</b> |
| <b>Intestinal related autoimmune</b> |                         |                         |                          |                          |
| Inflammatory bowel disease           | <b>0.60 (0.48-0.76)</b> | <b>0.65 (0.52-0.82)</b> | <b>1.42 (1.38-1.46)</b>  | <b>1.51 (1.46-1.56)</b>  |
| Celiac disease                       | 1.18 (0.39-3.51)        | 0.94 (0.32-2.81)        | <b>1.55 (1.38-1.74)</b>  | <b>1.80 (1.55-2.09)</b>  |
| <b>Type 1 DM</b>                     | 1.04 (0.77-1.41)        | 1.28 (0.91-1.78)        | <b>2.60 (2.48-2.72)*</b> | <b>2.38 (2.24-2.53)*</b> |
| <b>Mortality</b>                     | <b>0.50 (0.43-0.58)</b> | <b>0.61 (0.53-0.72)</b> | <b>0.91 (0.88-0.94)*</b> | <b>1.04 (1.01-1.08)*</b> |

\* Proportionality <0.01; CI: Confidence interval

Global network: including countries (# of HCOs): Australia (1), Brazil (5), Bulgaria (1), Germany (1), India (1), Italy (1), Lithuania (1), Malaysia (1), Poland (2), Singapore (1), Spain (3), Taiwan (1), United Kingdom (8), USA (47)

EMEA (Europe, Middle East and Africa) network: including countries (# of HCOs): Bulgaria (1), Germany (1), Italy (1), Lithuania (1), Malaysia (1), Poland (2), Spain (3), United Kingdom (8)

Crude: before matching; Adjusted: after matching.

a. Propensity score matching was performed based on age at index, sex, race, adverse socioeconomic status (problem related to housing and economic circumstances, problems related to employment and unemployment, problems related to education and literacy, occupational exposure to risk factors), and comorbidities (type 2 diabetes, vitamin D deficiency, hyperlipidemia, asthma, depression, chronic kidney disease, sleep disorder, psychoactive substance use, and BMI).



Abbreviations: DM, diabetes mellitus

**Table S7.** Sensitivity analysis (with/without accounting for competing risks)

| Outcomes                             | Hazard ratio (95%CI) |                       |                                |                       |
|--------------------------------------|----------------------|-----------------------|--------------------------------|-----------------------|
|                                      | Original model       |                       | Accounting for competing risks |                       |
|                                      | Crude                | Adjusted <sup>a</sup> | Crude                          | Adjusted <sup>a</sup> |
| <b>Inflammatory arthritis</b>        |                      |                       |                                |                       |
| Rheumatoid arthritis                 | 3.01 (2.87-3.16)*    | 2.98 (2.78-3.20)*     | 1.41 (1.38-1.44)*              | 1.45 (1.41-1.50)*     |
| Ankylosing spondylitis               | 3.01 (2.54-3.57)     | 3.21 (2.50-4.13)      | 1.17 (1.13-1.20)*              | 1.21 (1.17-1.25)*     |
| <b>Connective tissue disease</b>     |                      |                       |                                |                       |
| Systemic lupus erythematosus         | 3.26 (3.02-3.53)     | 3.00 (2.68-3.34)      | 1.27 (1.24-1.30)*              | 1.30 (1.26-1.35)*     |
| Dermatopolymyositis                  | 2.12 (1.71-2.63)     | 1.96 (1.47-2.61)      | 1.15 (1.12-1.18)*              | 1.20 (1.15-1.24)*     |
| Systemic sclerosis                   | 2.74 (2.31-3.26)     | 2.58 (2.02-3.28)      | 1.16 (1.13-1.19)*              | 1.20 (1.16-1.25)*     |
| Sjogren's syndrome                   | 2.91 (2.64-3.21)     | 2.62 (2.29-3.00)      | 1.21 (1.18-1.25)*              | 1.26 (1.22-1.30)*     |
| Mixed connective tissue disease      | 3.35 (2.66-4.23)     | 3.14 (2.26-4.36)      | 1.15 (1.12-1.19)*              | 1.20 (1.16-1.24)*     |
| Behçet's disease                     | 2.92 (1.97-4.34)     | 2.32 (1.38-3.89)      | 1.14 (1.11-1.18)*              | 1.19 (1.14-1.23)*     |
| Polymyalgia rheumatica               | 2.52 (2.19-2.90)     | 2.90 (2.36-3.57)      | 1.17 (1.14-1.20)*              | 1.22 (1.18-1.26)*     |
| Vasculitis                           | 1.99 (1.82-2.17)     | 1.96 (1.74-2.20)      | 1.22 (1.19-1.26)*              | 1.26 (1.22-1.30)*     |
| Psoriatic                            | 3.09 (2.91-3.28)*    | 2.91 (2.67-3.17)      | 1.34 (1.31-1.37)*              | 1.38 (1.34-1.43)*     |
| <b>Intestinal related autoimmune</b> |                      |                       |                                |                       |
| Inflammatory bowel disease           | 1.85 (1.80-1.90)     | 1.78 (1.72-1.84)      | 1.46 (1.44-1.49)*              | 1.47 (1.43-1.50)*     |
| Celiac disease                       | 1.96 (1.74-2.20)     | 1.85 (1.59-2.16)      | 1.17 (1.14-1.20)*              | 1.21 (1.17-1.25)*     |
| <b>Type 1 DM</b>                     | 3.42 (3.26-3.59)*    | 2.68 (2.51-2.85)*     | 1.48 (1.44-1.51)*              | 1.46 (1.42-1.51)*     |
| <b>Mortality</b>                     | 1.14 (1.11-1.17)*    | 1.20 (1.16-1.24)*     | 1.14 (1.11-1.17)*              | 1.18 (1.14-1.23)*     |

\* Proportionality <0.001; CI: Confidence interval;

Crude: before matching; Adjusted: after matching.

a. Propensity score matching was performed based on age at index, sex, race, adverse socioeconomic status (problem related to housing and economic circumstances, problems related to employment and unemployment, problems related to education and literacy, occupational exposure to risk factors), and comorbidities (type 2 diabetes, vitamin D deficiency, hyperlipidemia, asthma, depression, chronic kidney disease, sleep disorder, psychoactive substance use, and BMI).

Abbreviations: DM, diabetes mellitus

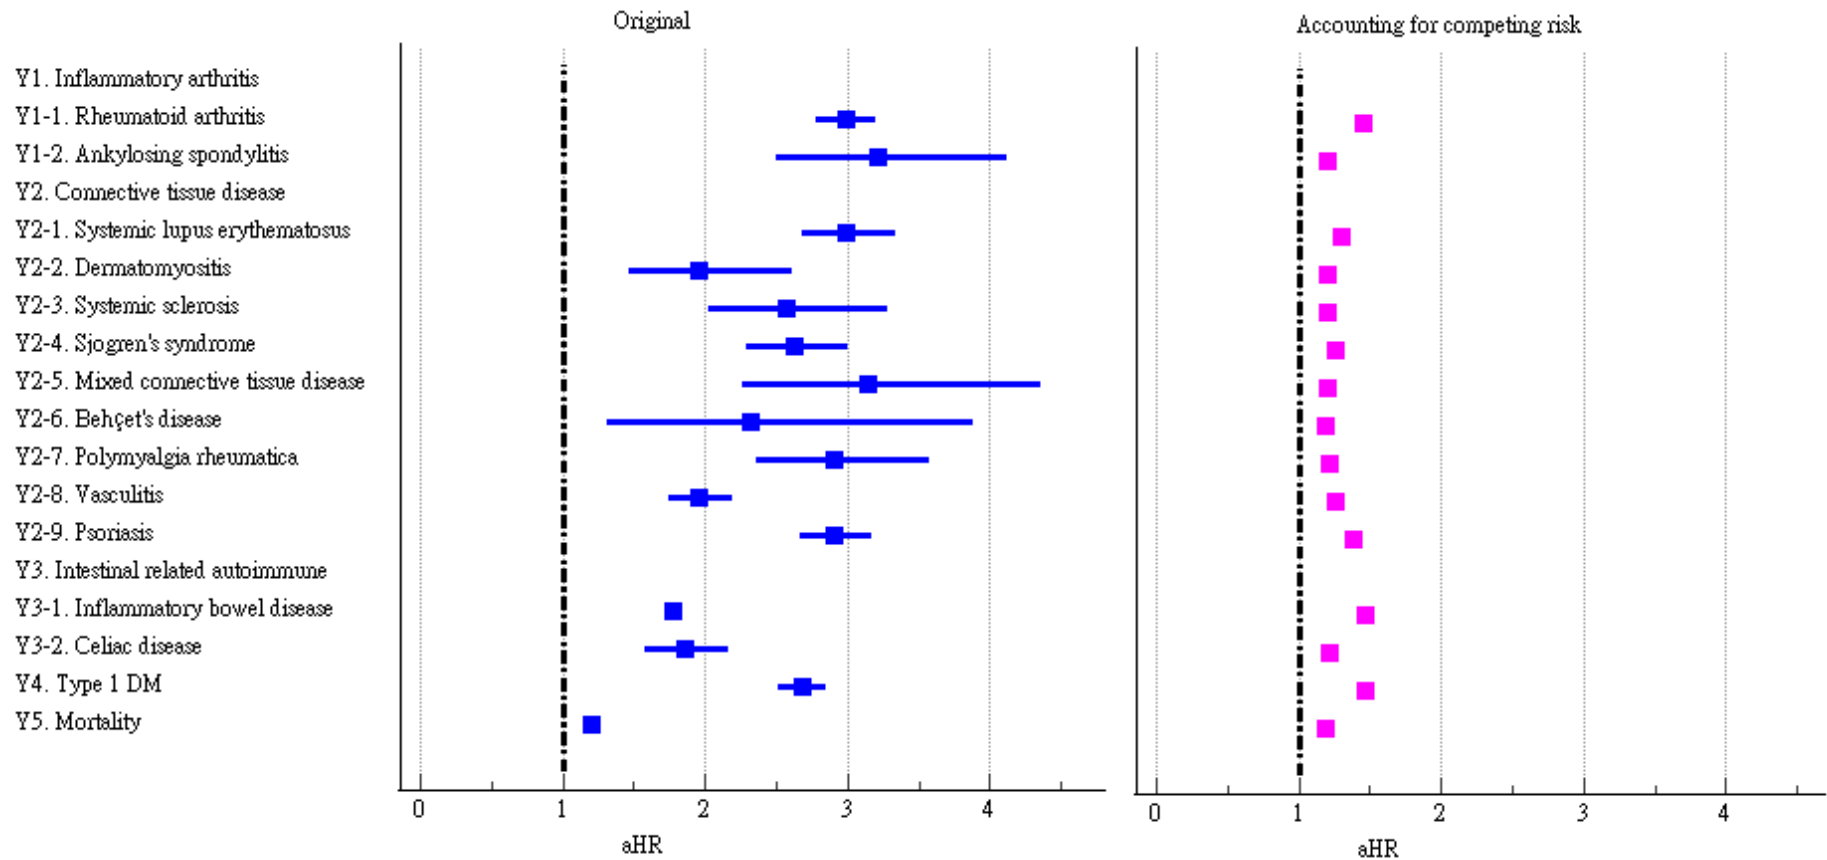

**Figure S1.** Forest plot of outcomes (with/without accounting for competing risks)

Abbreviations: DM, diabetes mellitus

**Table S8.** Results of the goodness-of-fit test between the case group of this study and the official COVID-19 laboratory-confirmed cases from the CDC COVID-19 data tracker

| Variables        | COVID-19 cohort_<br>present study | COVID-19 cohort_<br>official data <sup>a</sup> | Chi-square <sup>b</sup> . | Effect size <sup>c</sup><br>Pearson's r (95% CI) |
|------------------|-----------------------------------|------------------------------------------------|---------------------------|--------------------------------------------------|
| Gender           |                                   |                                                |                           |                                                  |
| Female           | 510200 (57.4%)                    | 29920075 (52.6%)                               | 4793.781***               | 0.0735 (0.0714-0.0755)                           |
| Male             | 377971 (42.5%)                    | 253300764 (44.6%)                              |                           |                                                  |
| Age group        |                                   |                                                |                           |                                                  |
| 18-64y           | 706636 (83.1%)                    | 48828562 (85.9%)                               | 5586.137***               | 0.081 (0.0789-0.0832)                            |
| 65+y             | 143917 (16.9%)                    | 80055276 (14.1%)                               |                           |                                                  |
| Ethnicity        |                                   |                                                |                           |                                                  |
| Hispanic/ Latino | 81184 (09.1%)                     | 5643316 (09.9%)                                | 748.867***                | 0.0289 (0.0268-0.0309)                           |
| Others           | 817101 (90.9%)                    | 51190522 (90.1%)                               |                           |                                                  |

a. Data source: Centers for Disease Control and Prevention, CDC, COVID-19 data tracker (<https://covid.cdc.gov/covid-data-tracker/#cases-deaths-trends-by-demographic>), age  $\geq$  18y;

b. Chi-Square Calculator for Goodness of Fit: <https://www.socscistatistics.com/tests/goodnessoffit/default2.aspx>

c. Practical Meta-Analysis Effect Size Calculator: <https://www.campbellcollaboration.org/escalc/html/EffectSizeCalculator-R5.php>
